# Supplementary material for: Application of the energetic span model to the electrochemical catalysis of proton reduction by a diiron azadithiolate complex
Source: Royal Society of Chemistry journal article supplement (doi:10.1039/c5nj00770d), 2015-01-01
Supplement: c5nj00770d1.pdf [file c5nj00770d1.pdf]

## Supporting information for

### Application of the energetic span model to the electrochemical catalysis of proton reduction by a diiron azadithiolate complex

Marc Bourrez,<sup>1,\*</sup> Frederic Gloaguen<sup>1,\*</sup>

<sup>1</sup> UMR 6521, CNRS, Université de Bretagne Occidentale, Brest, France

E-mail: marc.bourrez@univ-brest.fr (MB); fgloaguen@univ-brest.fr (FG)

#### Note about the calculation of transition free energies of electron transfer steps

In CV simulation studies of diiron hydrogenase models,<sup>1-3</sup> it is usually assumed that the electron transfers are fast compared to the proton transfers and the formation and release of H<sub>2</sub>. To test the validity of this assumption, it is necessary to calculate the activation energy of an electron transfer, which depends on the driving force  $\Delta G_{ET}$  and on the reorganization energy  $\lambda_{ET}$  as described by the Marcus' theory (eq. 1).<sup>4,5</sup> More sophisticated refinements of Marcus' theory, which take for instance into account the probability of occupancy of the Fermi levels of the electrode, have been developed but most of the parameters are not practically accessible.<sup>6</sup>

$$\Delta G_{ET}^{\ddagger} = \frac{\lambda_{ET}}{4} \left( 1 + \frac{\Delta G_{ET}}{\lambda_{ET}} \right)^2 \quad (1)$$

The reorganization energy of the electron transfer  $\lambda_{ET}$  corresponds to the total variation in energy due to both the change of geometry of the compound ( $\lambda_i$ ) and to the response of the solvent ( $\lambda_s$ ), within the solvation sphere of the substrate, consequently to the electron transfer. The inner-sphere reorganization energy ( $\lambda_i$ ) can be accurately computed considering a thermodynamic cycle (eq. 2) which takes into account the energy of the oxidized, and reduced, substrate ( $E^{ox}$  and  $E^{red}$  respectively) for the geometry of the oxidized, and reduced, state of the substrate in the gas phase ( $R^{ox}$  and  $R^{red}$  respectively).<sup>7,8</sup>

$$\lambda_i = 0.5 [ E^{ox}(R^{red}) - E^{ox}(R^{ox}) + E^{red}(R^{ox}) - E^{red}(R^{red}) ] \quad (2)$$

The calculation of the outer-sphere reorganization energy is less straightforward, but a rough estimate can be obtained by considering the substrate as a sphere and the electrode as an infinite plane.<sup>9</sup> Using this procedure, we calculated a total reorganization energy value  $\lambda_{\text{ET}} \sim 0.8$  eV for both **2**  $\rightarrow$  **3** and **5**  $\rightarrow$  **6**. This value corresponds to a heterogeneous rate constant of electron transfer at the electrode  $k_s > 1 \text{ cm s}^{-1}$ ,<sup>10</sup> indicating that the electron transfers are fast and therefore not kinetically limiting.

**Table S1.** Comparison between experimental and calculated geometrical parameters for **1**. Experimental data from ref 16.

|          | experimental<br>(Å or °) <sup>11</sup> | DFT (Å or °) | absolute error |
|----------|----------------------------------------|--------------|----------------|
| Fe-Fe    | 2,515                                  | 2,533        | 0,018          |
| Fe1-S1   | 2,258                                  | 2,3          | 0,042          |
| Fe1-S2   | 2,258                                  | 2,3          | 0,042          |
| Fe2-S1   | 2,258                                  | 2,309        | 0,051          |
| Fe2-S2   | 2,258                                  | 2,309        | 0,051          |
| Fe1-Coap | 1,795                                  | 1,79         | 0,005          |
| Fe2-Coap | 1,795                                  | 1,789        | 0,006          |
| S1-CH    | 1,855                                  | 1,874        | 0,019          |
| S2-CH    | 1,861                                  | 1,874        | 0,013          |
| C-N      | 1,401                                  | 1,426        | 0,025          |
|          | 1,419                                  | 1,426        | 0,007          |
|          |                                        |              |                |
| Fe-S-Fe  | 67,67                                  | 66,7         | 0,97           |
|          | 67,7                                   | 66,7         | 1              |
| S-Fe-S   | 85,08                                  | 84,9         | 0,18           |
| HC-N-CH  | 117,82                                 | 117,1        | 0,72           |

|           | mean abs<br>error | median abs<br>error |
|-----------|-------------------|---------------------|
| distances | 0,025363636       | 0,019               |

|        |        |       |
|--------|--------|-------|
| angles | 0,7175 | 0,845 |
|--------|--------|-------|

### Cartesian coordinates for TS1

25

Coordinates from ORCA-job adtHTS

|    |                   |                   |                   |
|----|-------------------|-------------------|-------------------|
| C  | 4.16945247605324  | 9.01722174940759  | 2.47270498262390  |
| C  | 5.59820113803191  | 10.94546851715979 | 1.87710820008900  |
| C  | 5.34786191163822  | 9.98991918441226  | 4.58182732875753  |
| C  | 7.67637785722816  | 6.85671175105073  | 5.62570327217660  |
| C  | 8.42969680880012  | 9.36978226950908  | 5.82944171903318  |
| C  | 9.93724655105410  | 7.61147137916490  | 4.24140283274304  |
| C  | 6.86187622015669  | 6.95392978577455  | 1.33695190634244  |
| H  | 7.52411163396210  | 6.11997768338700  | 1.08653692333323  |
| H  | 5.90598059090271  | 6.84562445216877  | 0.81442111518198  |
| C  | 8.62752318021701  | 8.83929872493175  | 1.40349367731617  |
| H  | 9.08091885927404  | 9.47865666498857  | 0.65996441643597  |
| H  | 6.62141782370161  | 8.92461505098769  | 0.99711157659710  |
| Fe | 8.13067262433917  | 8.20536917940678  | 4.45672096687603  |
| Fe | 5.81333110105709  | 9.52619582241933  | 2.90798457066223  |
| N  | 7.42186015229574  | 8.22666338163538  | 0.75848623856267  |
| O  | 3.09131040844154  | 8.69164322948740  | 2.23611599591801  |
| O  | 5.43475998845622  | 11.90586912793717 | 1.26416570064080  |
| O  | 4.92965818003056  | 10.46533407614791 | 5.53961236206190  |
| O  | 7.40427526862964  | 5.98699326852636  | 6.32002121289112  |
| O  | 8.66713017526846  | 10.08751541608802 | 6.69296752101633  |
| O  | 11.07533490415856 | 7.48597991328789  | 4.28205281182625  |
| S  | 8.22509434052013  | 9.85283756868032  | 2.87165849393034  |
| S  | 6.43845368422896  | 7.17338981083443  | 3.07049694197204  |
| H  | 9.29877873951540  | 8.03811585825061  | 1.66600699497511  |
| H  | 7.58698538203862  | 8.13950613435610  | -0.24100776196294 |

## Cartesian coordinates for TS2

26

Coordinates from ORCA-job adtHydNH\_TS\_MeCN

|    |                   |                   |                   |
|----|-------------------|-------------------|-------------------|
| C  | 5.26608047508864  | 11.01018086016596 | 2.09000927373149  |
| C  | 6.26120368815226  | 9.92440943405423  | 4.39245490381421  |
| C  | 4.02891516095967  | 8.94192533122855  | 3.12068306337431  |
| C  | 7.74938202648247  | 8.32179367974841  | 5.94621492357147  |
| C  | 8.93450145114124  | 10.33868172371844 | 4.74483393602467  |
| C  | 9.54532408733567  | 7.78891394276203  | 3.98647270085865  |
| C  | 7.19139838009823  | 6.48616264732391  | 1.95442317910819  |
| H  | 8.17714882987588  | 6.09033960903494  | 2.20560396726155  |
| H  | 6.53867282220093  | 5.66598321514371  | 1.66616721995516  |
| C  | 8.35038740732640  | 8.40614715670747  | 0.89121248820130  |
| H  | 8.47316731061848  | 8.84410710415420  | -0.09645661439046 |
| H  | 6.14237264314682  | 8.17238183549821  | 0.95165889087684  |
| Fe | 8.05717313514452  | 8.85771034395585  | 4.26968472243978  |
| Fe | 5.68287247367289  | 9.37027914190314  | 2.63327235299778  |
| N  | 7.26691311996740  | 7.42112207112018  | 0.82796784912024  |
| O  | 5.02460351849654  | 12.07426749806011 | 1.75340289353616  |
| O  | 5.81745645900505  | 10.55839028213899 | 5.29405993991514  |
| O  | 2.97032513986741  | 8.64933639165898  | 3.43080959542544  |
| O  | 7.52254274327966  | 7.99697082178325  | 7.01551453947480  |
| O  | 9.48847016564872  | 11.30008232784275 | 5.01049749412107  |
| O  | 10.49371486126147 | 7.15899687797058  | 3.94543359444513  |
| S  | 7.96602075966261  | 9.77947680018937  | 2.05240990450557  |
| S  | 6.45926110798728  | 7.25483095096651  | 3.45788203490491  |
| H  | 9.28890104305372  | 7.93851837774941  | 1.19482242358932  |
| H  | 5.35189470808827  | 8.73635325207642  | 1.11461676259504  |
| H  | 7.27857648243766  | 6.92199832304436  | -0.05774203945784 |

## References

- (1) Capon, J.-F.; Ezzaher, S.; Gloaguen, F.; Pétillon, F. Y.; Schollhammer, P.; Talarmin, J.; Davin, T. J.; McGrady, J. E.; Muir, K. W. *New J. Chem.* **2007**, *31* (12), 2052.
- (2) Capon, J.-F.; Gloaguen, F.; Schollhammer, P.; Talarmin, J. *J. Electroanal. Chem.* **2004**, *566* (2), 241–247.
- (3) Capon, J. F.; Gloaguen, F.; Schollhammer, P.; Talarmin, J. *J. Electroanal. Chem.* **2006**, *595*, 47–52.
- (4) Marcus, R. A.; Sutin, N. *Biochim. Biophys. Acta BBA - Rev. Bioenerg.* **1985**, *811* (3), 265–322.
- (5) Hammes-Schiffer, S.; Stuchebrukhov, A. A. *Chem. Rev.* **2010**, *110* (12), 6939–6960.
- (6) Laborda, E.; Henstridge, M. C.; Batchelor-McAuley, C.; Compton, R. G. *Chem. Soc. Rev.* **2013**, *42* (12), 4894.
- (7) Fernandez, L. E.; Horvath, S.; Hammes-Schiffer, S. *J. Phys. Chem. C* **2012**, *116* (4), 3171–3180.
- (8) Fernandez, L. E.; Horvath, S.; Hammes-Schiffer, S. *J. Phys. Chem. Lett.* **2013**, *4* (3), 542–546.
- (9) Fernandes, J. B.; Zhang, L. Q.; Schultz, F. A. *J. Electroanal. Chem. Interfacial Electrochem.* **1991**, *297* (1), 145–161.
- (10) Huang, Y.-F.; Wu, D.-Y.; Wang, A.; Ren, B.; Rondinini, S.; Tian, Z.-Q.; Amatore, C. *J. Am. Chem. Soc.* **2010**, *132* (48), 17199–17210.
- (11) Stanley, J. L.; Heiden, Z. M.; Rauchfuss, T. B.; Wilson, S. R.; De Gioia, L.; Zampella, G. *Organometallics* **2008**, *27* (1), 119–125.
